# Supplementary material for: Size dependent biological profiles of PEGylated gold nanorods
Source: Royal Society of Chemistry journal article supplement (doi:10.1039/c4tb00991f), 2014-01-01
Supplement: c4tb00991f1.pdf [file c4tb00991f1.pdf]

## Electronic Supplementary Information

### Supplementary Methods

#### Cell lines and culture conditions

For cellular studies, three human ovarian tumor cell lines (SKOV3, IGROV-1 and A2780/S), one human cervix carcinoma cell line (HeLa) and one murine monocytic/macrophagic cell line (J774a.1) were used. A2780/S and IGROV-1 cell lines were maintained in RPMI1640 medium, HeLa and J774a.1 cell lines in DMEM medium and SKOV-3 cell line in F-12 medium. All cell lines were supplemented with fetal bovine serum, 100 units/mL penicillin, and 100 µg/mL streptomycin and maintained under standard culture conditions (37°C, 5% CO<sub>2</sub>, 95% air and 100% relative humidity).

#### Cell growth inhibition studies

The cytotoxic effects of five different GNRs samples (1/9, 1/3, 1, 3 and 9) were evaluated against SKOV3, IGROV-1, A2780/S and HeLa, according to the sulforhodamine B (SRB) assay described by Skehan *et al.*<sup>[33]</sup>. Exponentially growing cells were inoculated into 96-well microplates at specific plating density/well (range 1 – 5 × 10<sup>3</sup>) according to the various types of cell lines. After 24 h, the medium was replaced with fresh medium containing PEG-GNRs for exposure times of 72 and 168 h. Gold concentrations in the different suspensions ranged from 0.003 to 100 µM. Cells were then fixed *in situ* by 10% trichloroacetic acid (TCA) and stained by SRB solution at 0.4% (w/v) in 1% acetic acid. After staining, unbound dye was removed by washing five times with 1% acetic acid and the plates were air dried. Bound stain was subsequently solubilized with 10 mM tris base and its absorbance was read on an

automated plate reader at a wavelength of 540 nm. The IC<sub>50</sub> gold concentration resulting in a 50% reduction in the net protein content in cells treated with particles as compared to controls was determined after 72 or 168 h particle exposures. The IC<sub>50</sub> data represent the mean of at least three independent experiments.

### **Cell viability studies**

Exponentially growing cells were inoculated into 96-well microplates and maintained under standard culture conditions for 24 h. Thereafter, the medium was replaced with fresh medium containing different concentrations of PEG-GNRs. After 24 h, the MTT reduction assay described by Mosmann<sup>[34]</sup> was performed: cells were incubated with a 0.5 mg/ml MTT solution at 37°C for 4 h and then with cell lysis buffer (20% SDS, 50% N,Ndimethylformamide, pH 4.7) for 3 h. The absorbance values of blue formazan were determined at 590 nm by an automated plate reader.

## Supplementary data

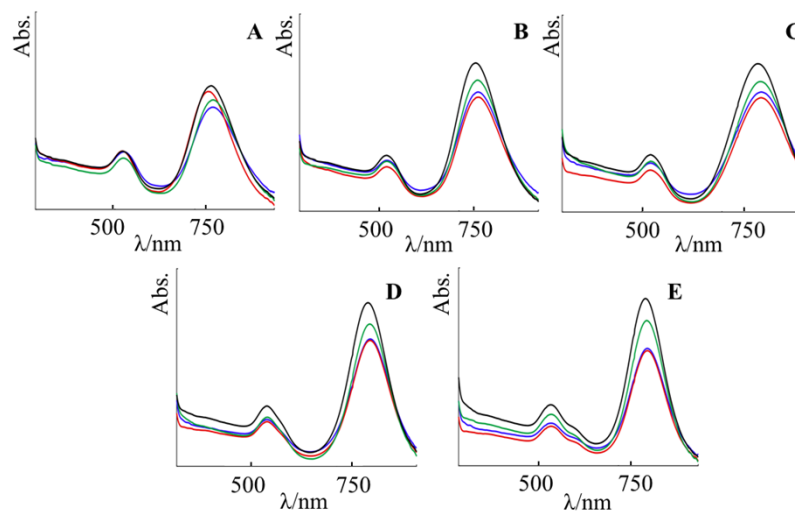

**Fig. S1. Stability of PEGylated gold nanorods with lysozyme.** Absorption spectra of five sizes of PEG-GNRs in PBS with lysozyme. A) GNRs 1/9; B) 1/3; C) 1; D) 3; E) 9.

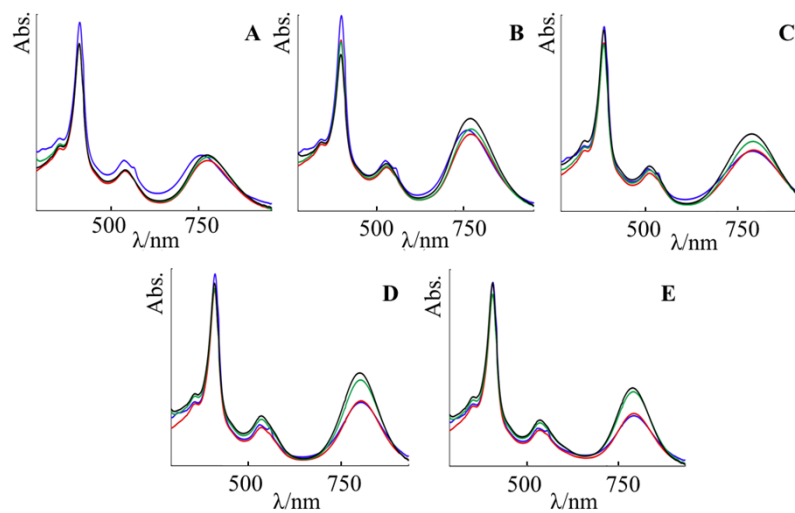

**Fig. S2. Stability of PEGylated gold nanorods with cyt c.** Absorption spectra of five sizes of PEG-GNRs in PBS with cyt c. A) GNRs 1/9; B) 1/3; C) 1; D) 3; E) 9.

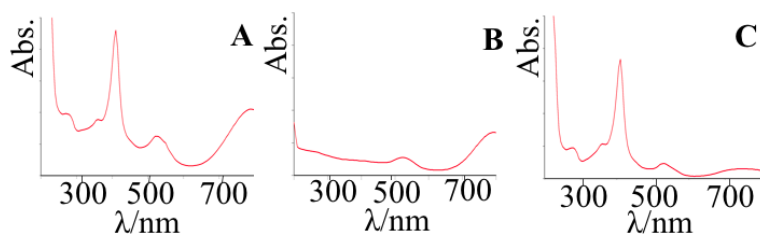

**Fig. S3. Interaction of PEGylated gold nanorods with cyt c.** Absorption spectra of PEG-GNRs 1 with cyt c incubated for 24 h at 37°C (A) and after centrifugation and washing (B). Supernatant obtained after the first washing cycle (C).

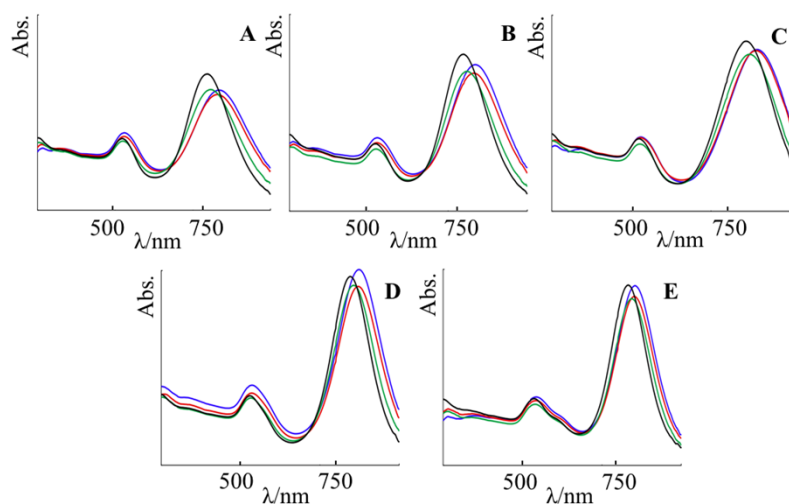

**Fig. S4. Stability of PEGylated gold nanorods in RPMI.** Light extinction spectra of PEG-GNRs of different average size in RPMI A) GNRs 1/9; B) 1/3; C) 1; D) 3; E) 9. The figure shows spectra recorded at time zero (black line) and after 24h (green line), 72h (red line) and 168h (blue line).

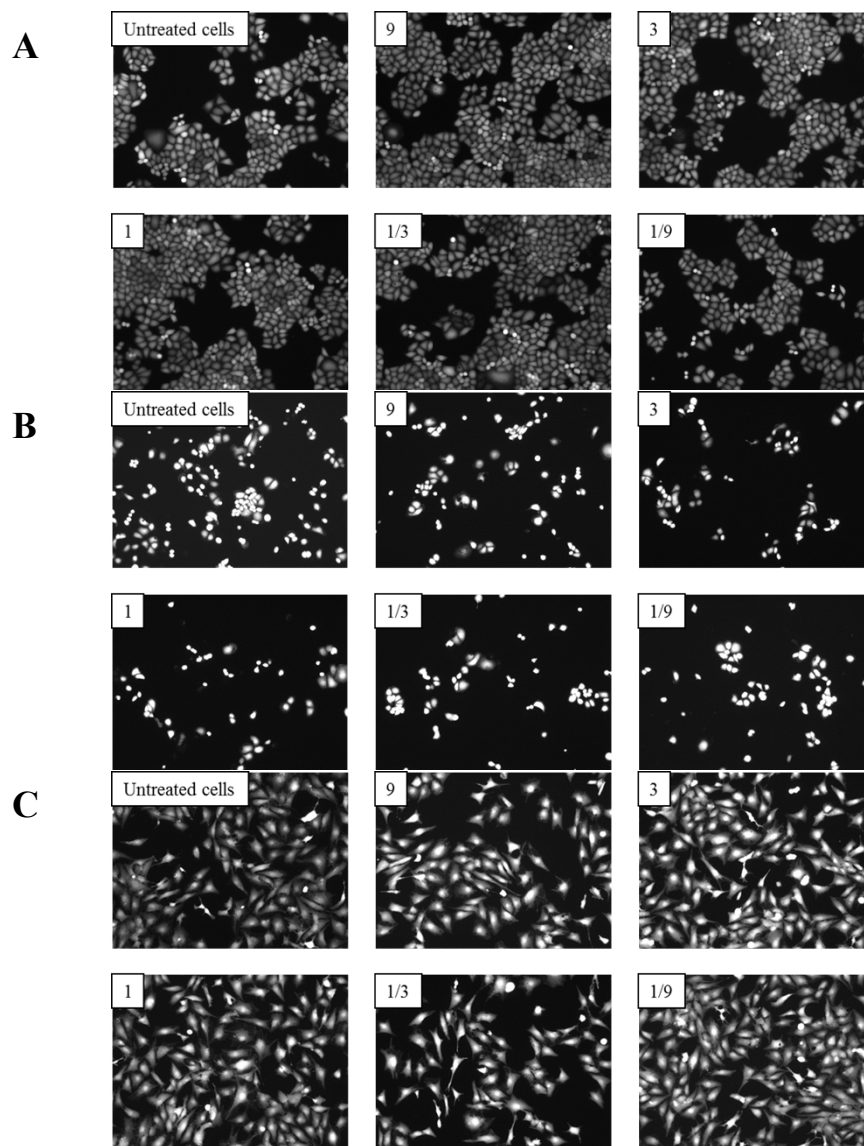

**Fig. S5. Membrane integrity.** Calcein fluorescence in HeLa (A), IGROV (B) and SKOV3 (C) untreated cells and after treatment with PEG-GNRs of different sizes. All samples exhibit no release of calcein after treatment with GNRs, indicating that the membrane integrity has not been altered.

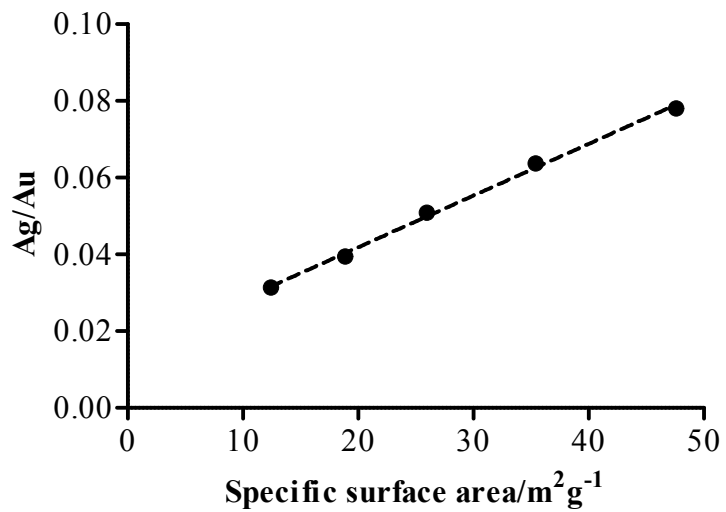

**Fig. S6. Particle composition by elemental analysis.** Ratio between Ag and Au among the different sizes of PEG-GNRs.
